# Supplementary material for: Behavioral effects of scents from male mature Rathke glands on juvenile green sea turtles (Chelonia mydas)
Source: PubMed Central journal article supplement — J Vet Med Sci. 2020 Jul 13;82(9):1312–5. doi: 10.1292/jvms.20-0058 (PMC7538326; doi:10.1292/jvms.20-0058), 2020-07-13
Supplement: jvms-82-1312-s002.pdf [file jvms-82-1312-s002.pdf]

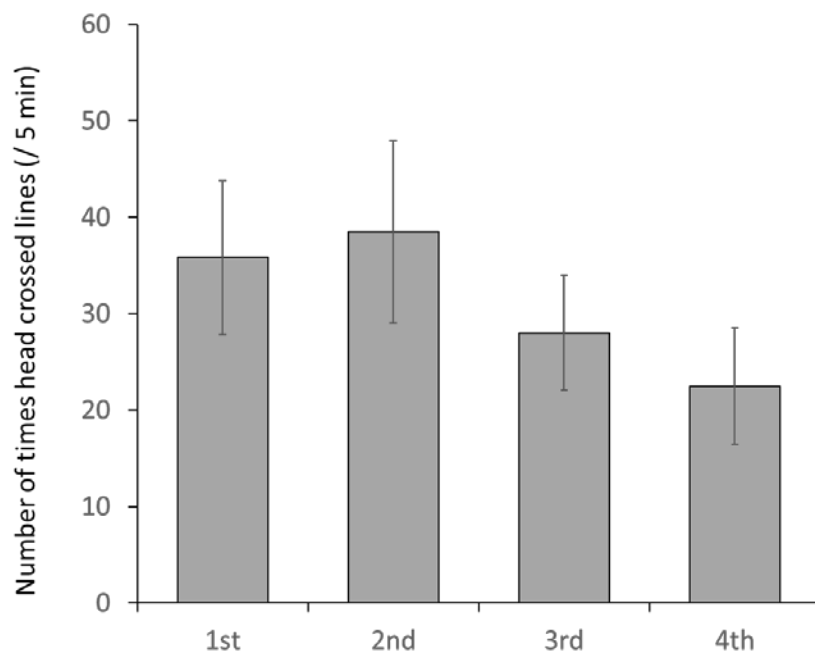

**Supplementary Fig. 1.**

Relationship between presentation orders (1st to 4th) and number of times the head crossed. There was no significant difference between orders (paired t tests with Holm multiple comparison tests).
